# Supplementary material for: Functionalized lanthanide coordination polymer nanoparticles for selective sensing of hydrogen peroxide in biological fluids
Source: Royal Society of Chemistry journal article supplement (doi:10.1039/c4an01152j), 2014-01-01
Supplement: c4an01152j1.pdf [file c4an01152j1.pdf]

## Supporting information

### **Functionalized Lanthanide Coordination Polymers Nanoparticles for Selective Sensing of Hydrogen Peroxide in Biological Fluids**

Hongliang Tan\*, Chanjiao Ma, Qian Li, Li Wang, Fugang Xu, Shouhui Chen, Yonghai Song\*

Key Laboratory of Functional Small Organic Molecule, Ministry of Education, Key Laboratory of  
Chemical Biology, Jiangxi Province, College of Chemistry and Chemical Engineering, Jiangxi  
Normal University, Nanchang, 330022, P R China

\*Corresponding author: E-mail: [hltan@jxnu.edu.cn](mailto:hltan@jxnu.edu.cn) (H. Tan); [yhsong@jxnu.edu.cn](mailto:yhsong@jxnu.edu.cn) (Y. Song)

Tel/Fax: +86 791 88120861

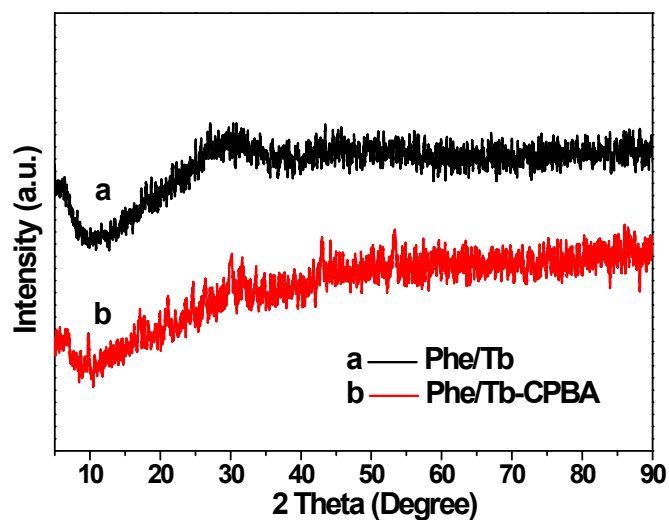

Figure S1. Typical XRD patterns of coordination polymers Phe/Tb CPNPs (a) and Phe/Tb-CPBA CPNPs (b).

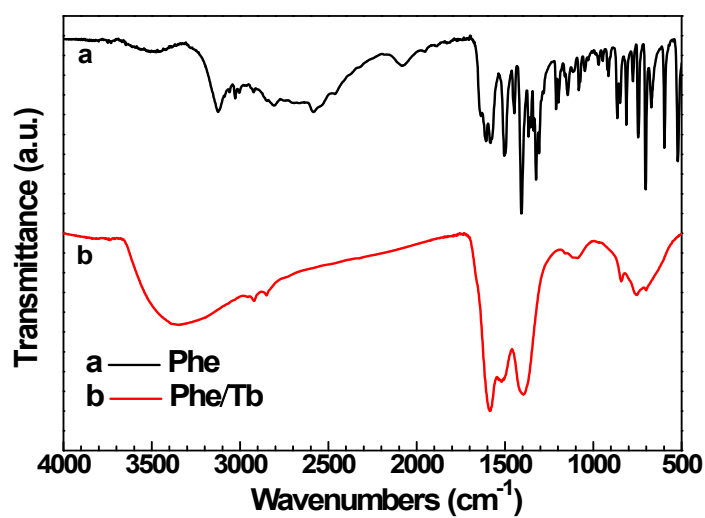

Changes of wavenumbers in FTIR spectra <sup>1,2</sup>

| Assignments                                     | Phe (cm <sup>-1</sup> ) | Phe/Tb(cm <sup>-1</sup> ) |
|-------------------------------------------------|-------------------------|---------------------------|
| NH <sub>3</sub> <sup>+</sup> asymmetric bending | 1618                    |                           |
| C=O asymmetric stretching                       | 1596                    | 1577                      |
| NH <sub>2</sub> symmetric stretching            | 1494                    | 1519                      |
| C-N symmetric stretching                        | 1075                    | 1096                      |
| NH <sub>3</sub> <sup>+</sup> rocking            | 856                     | 843                       |

Figure S2. FTIR spectra of pure Phe (a) and Phe/Tb CPNPs (b).

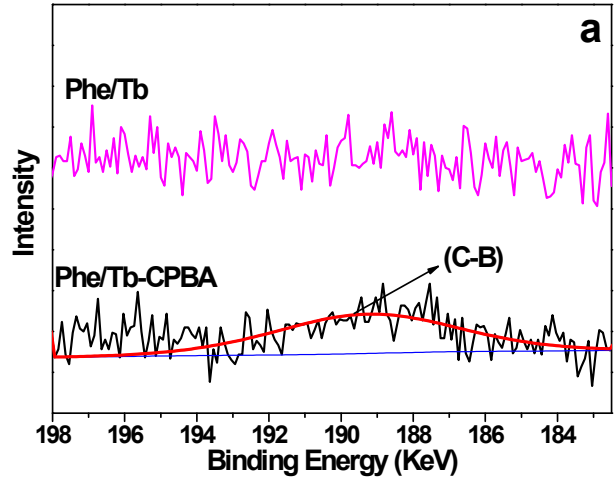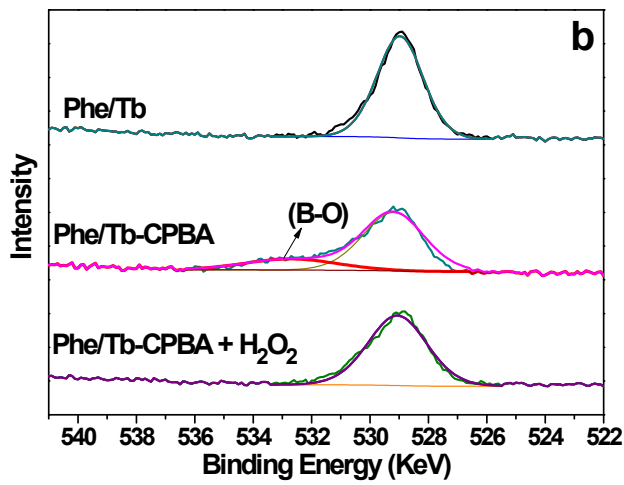

Figure S3. XPS spectra of B1s for Phe/Tb CPNPs and Phe/Tb-CPBA CPNPs (a) and O1s for Phe/Tb CPNPs, Phe/Tb-CPBA CPNPs and Phe/Tb-CPBA CPNPs treated with H<sub>2</sub>O<sub>2</sub> (b).

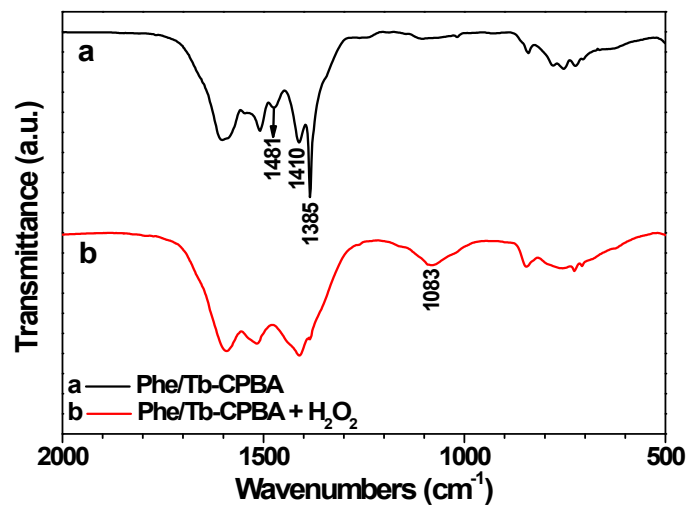

Figure S4. FTIR spectra of (a) Phe/Tb-CPBA CPNPs and (b) Phe/Tb-CPBA CPNPs in the present of 200 μM H<sub>2</sub>O<sub>2</sub>.

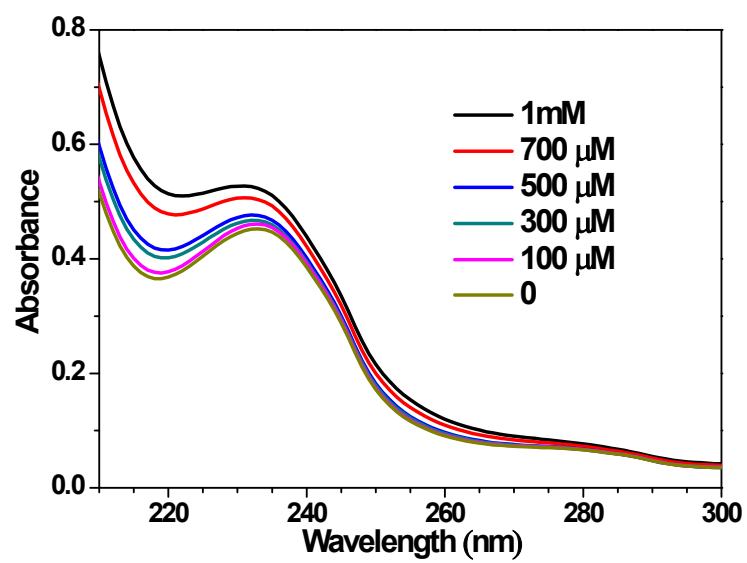

Figure S5. Absorption spectra of Phe/Tb-CPBA CPNPs in the presence of H<sub>2</sub>O<sub>2</sub> with different concentrations.

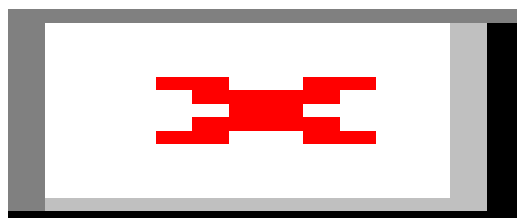

Figure S6. SEM images of Phe/Tb-CPBA CPNPs (a) and Phe/Tb-CPBA CPNPs treated with H<sub>2</sub>O<sub>2</sub> (b).

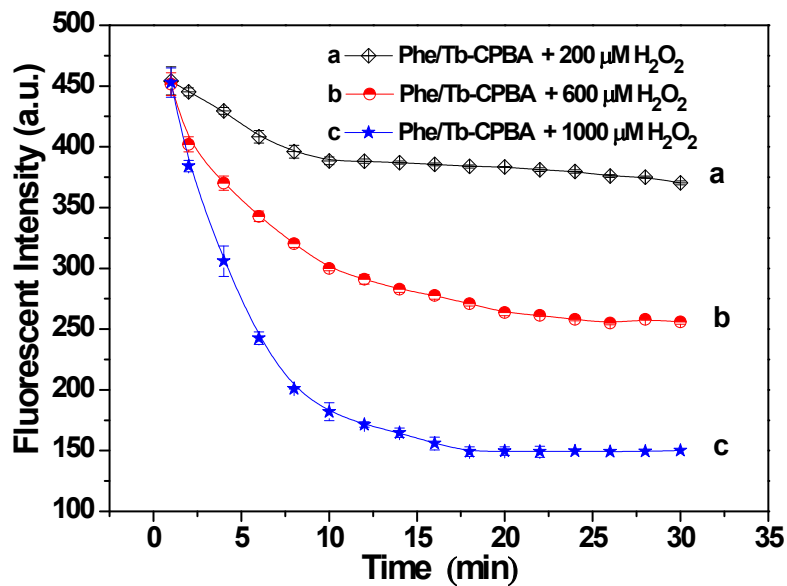

Figure S7. Changes of the fluorescence intensities of Phe/Tb-CPBA CPNPs at 545 nm with the reaction time in the presence of different concentrations of H<sub>2</sub>O<sub>2</sub> (200, 600 and 1000 μM).

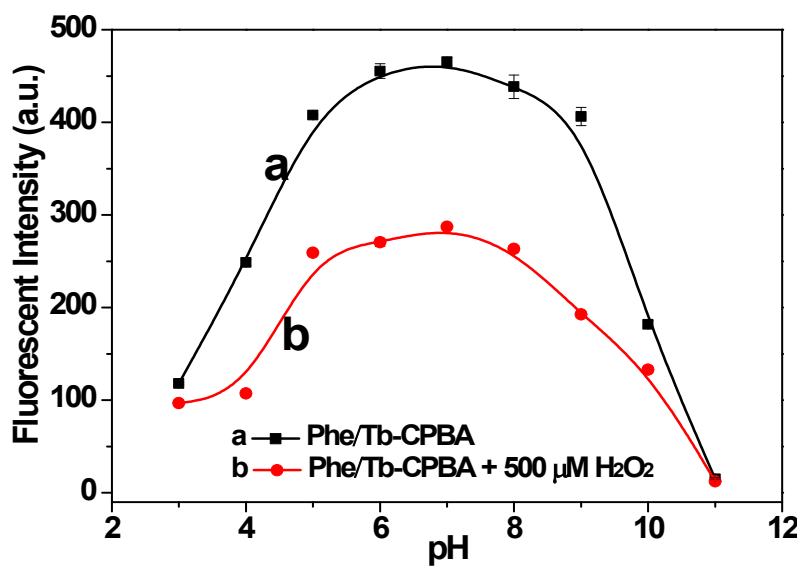

Figure S8. Effects of pH on the fluorescent intensity of Phe/Tb-CPBA CPNPs (a) and Phe/Tb-CPBA CPNPs in the presence of 500 μM H<sub>2</sub>O<sub>2</sub> (b).

Table S1. Comparison of various methods for the detection of H<sub>2</sub>O<sub>2</sub>

| Methods / Sensors                                        | Linear range<br>( $\mu\text{M}$ ) | Detection limit<br>( $\mu\text{M}$ ) | Real samples          | Refs.     |
|----------------------------------------------------------|-----------------------------------|--------------------------------------|-----------------------|-----------|
| Colorimetry/Fe <sub>3</sub> O <sub>4</sub> nanoparticles | 5-100                             | 3                                    | no                    | 3         |
| Colorimetry/photo-Fenton reactions                       | 25-6000                           | 143                                  | no                    | 4         |
| Electrochemiluminescence/batch injection analysis        | 100-4000                          | 10                                   | milk                  | 5         |
| Electrochemiluminescence/Graphene-Cu <sub>2</sub> O      | 300-7800                          | 20.8                                 | no                    | 6         |
| Electrochemiluminescence/Graphene Oxide                  | 5-1500                            | 0.27                                 | human serum and urine | 7         |
| Electrochemiluminescence/G-quadruplex                    | 0.1-20                            | N.A.                                 | cancer cells          | 8         |
| Fluorescence/ Cationic conjugated polymers               | N.A.                              | 0.015                                | no                    | 9         |
| Fluorescence/Fenton reaction system                      | 0.02-20                           | 0.005                                | milk                  | 10        |
| Fluorescence/BTTA-Eu <sup>3+</sup>                       | 100-1000                          | no                                   | no                    | 11        |
| Fluorescence/Phe/Tb-CPBA CPNPs                           | 6-1000                            | 2                                    | urine                 | This work |

Table S2. Determination of H<sub>2</sub>O<sub>2</sub> in urine samples.

| Samples | Found ( $\mu\text{M}$ ) | Added ( $\mu\text{M}$ ) | Detected ( $\mu\text{M}$ ) | Recovery (%) | RSD (n=3, %) |
|---------|-------------------------|-------------------------|----------------------------|--------------|--------------|
| Urine 1 | 15.60                   | 0                       | 15.60                      | —            | 1.38         |
| Urine 2 | 15.60                   | 50                      | 65.53                      | 99.55        | 7.70         |
| Urine 3 | 15.60                   | 100                     | 115.96                     | 102.31       | 4.99         |
| Urine 4 | 15.60                   | 150                     | 165.39                     | 98.65        | 3.07         |

## References

1. R. Mahalakshmi, S. X. Jesuraja and S. J. Das, *Cryst. Res. Technol.*, 2006, **41**, 780-783.
2. E. Ramachandran and S. Natarajan, *Cryst. Res. Technol.*, 2007, **42**, 617-620.
3. H. Wei and E. Wang, *Anal. chem.*, 2008, **80**, 2250-2254.
4. R. F. P. Nogueira, M. C. Oliveira and W. C. Paterlini, *Talanta*, 2005, **66**, 86-91.
5. R. A. Silva, R. H. Montes, E. M. Richter and R. A. Munoz, *Food Chem.*, 2012, **133**, 200-204.
6. M. Liu, R. Liu and W. Chen, *Biosens. Bioelectron.*, 2013, **45**, 206-212.
7. J. Bai and X. Jiang, *Anal. Chem.*, 2013, **85**, 8095-8101.
8. Z.-H. Wang, C.-Y. Lu, J. Liu, J.-J. Xu and H.-Y. Chen, *Chem. Commun.*, 2014, **50**, 1178-1180.
9. F. He, Y. Tang, M. Yu, S. Wang, Y. Li and D. Zhu, *Adv. Funct. Mater.*, 2006, **16**, 91-94.
10. M. E. Abbas, W. Luo, L. Zhu, J. Zou and H. Tang, *Food Chem.*, 2010, **120**, 327-331.
11. M. Liu, Z. Ye, G. Wang and J. Yuan, *Talanta*, 2012, **91**, 116-121.
